# Supplementary material
Source: PubMed Central journal article supplement (PMC3864734)
Supplement: supp_mct264_mct264supp.pdf [file supp_mct264_mct264supp.pdf]

## SUPPLEMENTARY DATA

GenBank accession numbers for previously sequenced monocot taxa used in this study, listed either as complete plastomes or by individual genes. Publications in which the original data appeared, herbarium vouchers (where available), and live collection numbers (where available) are given. Herbarium codes are listed in the caption for Table 1.

*Acorus calamus* L., (Acorales, Acoraceae), Goremykin *et al.* (2005), NC\_007407

*Spirodela polyrhiza* (L.) Schleid., (Alismatales, Araceae, Lemnoideae), Wang and Messing (2011), NC\_015891

*Lemna minor* L., (Alismatales, Araceae, Lemnoideae), Mardanov *et al.* (2008), NC\_010109

*Wolffia australiana* (Benth.) Hartog & Plas., (Alismatales, Araceae, Lemnoideae), Wang and Messing (2011), NC\_015899

*Wolffiella lingulata* (Hegelm.) Hegelm., (Alismatales, Araceae, Lemnoideae), Wang and Messing (2011), NC\_015894

*Japonolirion osense* T.Nakai, (Petrosaviales, Petrosaviaceae), Davis *et al.*, (in press), JQ068951- JQ069028

*Dioscorea elephantipes* (L'Hér.) Engl., (Dioscoreales, Dioscoreaceae), Hansen *et al.* (2007), NC\_009601

*Pandanus utilis* Bory, (Pandanales, Pandanaceae), Givnish *et al.* (2010), Zomlefer 2348 (GA), HQ180472 (atpB), HQ180515 (atpE), HQ180764 (ccsA), HQ180687 (cemA), HQ180724 (clpP), HQ180798 (infA), HQ180879 (matK), HQ180920 (ndhA), HQ180962 (ndhB), HQ181006 (ndhC), HQ181048 (ndhD), HQ181089 (ndhE), HQ181127 (ndhF), HQ181169 (ndhG), HQ181213 (ndhH), HQ181255 (ndhI), HQ181299 (ndhJ), HQ181338 (ndhK), HQ181378 (petA), HQ181422 (petB), HQ181466 (petD), HQ181509 (petG), HQ181550 (petL), HQ181592 (petN), HQ181635 (psaA), HQ181678 (psaB), HQ181721 (psaC), HQ181763 (psaI), HQ181803 (psaJ), HQ181846 (psbA), HQ181889 (psbB), HQ181932 (psbC), HQ181975 (psbD), HQ182018 (psbE), HQ182061 (psbF), HQ182103 (psbH), HQ182146 (psbI), HQ182188 (psbJ), HQ182230 (psbK), HQ182272 (psbL), HQ182314 (psbM), HQ182357 (psbN), HQ182400 (psbT), HQ180839 (psbZ), HQ182443 (rbcL), HQ182527 (rpl14), HQ182569 (rpl16), HQ182485 (rpl2), HQ182611 (rpl20), HQ182649 (rpl22), HQ182693 (rpl23), HQ182725 (rpl32), HQ182766 (rpl33), HQ182808 (rpl36), HQ182847 (rpoA), HQ182888 (rpoB), HQ182930 (rpoC1), HQ182972 (rpoC2), HQ183217 (rps11), HQ183253 (rps12), HQ183293 (rps14), HQ183331 (rps15), HQ183405 (rps18), HQ183446 (rps19), HQ183050 (rps3), HQ183091 (rps4), HQ183133 (rps7), HQ183176 (rps8), HQ183518 (rrn16), HQ183584 (rrn23), HQ183477 (rrn5), HQ183617 (ycf2), HQ183656 (ycf3), HQ183698 (ycf4)

*Lilium superbum* L., (Liliales, Liliaceae), Givnish *et al.* (2010), Givnish UW-8-2009-1 (WIS), HQ180423 (atpA), HQ180465 (atpB), HQ180508 (atpE), HQ180552 (atpF), HQ180595 (atpH), HQ180638 (atpI), HQ180758 (ccsA), HQ180681 (cemA), HQ180718 (clpP), HQ180792 (infA), HQ180873 (matK), HQ180914 (ndhA), HQ180955 (ndhB), HQ180999 (ndhC), HQ181042 (ndhD), HQ181083 (ndhE), HQ181120 (ndhF), HQ181163 (ndhG), HQ181206 (ndhH), HQ181248 (ndhI), HQ181292 (ndhJ), HQ181331 (ndhK), HQ181372 (petA), HQ181415 (petB), HQ181459 (petD), HQ181502 (petG), HQ181543 (petL), HQ181586 (petN), HQ181628 (psaA), HQ181671 (psaB), HQ181714 (psaC), HQ181757 (psaI), HQ181797 (psaJ), HQ181839 (psbA), HQ181882 (psbB), HQ181925 (psbC), HQ181968 (psbD), HQ182011 (psbE), HQ182055 (psbF), HQ182097 (psbH), HQ182140 (psbI), HQ182181 (psbJ), HQ182224 (psbK), HQ182266 (psbL), HQ182308 (psbM), HQ182350 (psbN), HQ182394 (psbT), HQ180833 (psbZ), HQ182436 (rbcL), HQ182520 (rpl14), HQ182563 (rpl16), HQ182478 (rpl2), HQ182605 (rpl20), HQ182644 (rpl22), HQ182686 (rpl23), HQ182721 (rpl32), HQ182759 (rpl33), HQ182801 (rpl36), HQ182841 (rpoA), HQ182882 (rpoB), HQ182924 (rpoC1), HQ182965 (rpoC2), HQ183211 (rps11), HQ183247 (rps12), HQ183286 (rps14), HQ183326 (rps15), HQ183360 (rps16), HQ183398 (rps18), HQ183439 (rps19), HQ183006 (rps2), HQ183045 (rps3), HQ183084 (rps4), HQ183126 (rps7), HQ183169 (rps8), HQ183512 (rrn16), HQ183578 (rrn23), HQ183472 (rrn5), HQ183611 (ycf2), HQ183649 (ycf3), HQ183692 (ycf4)

***Oncidium Sw.* [=×*Oncidesa Hort.*] ‘Gower Ramsey’, (Asparagales, Orchidaceae, Epidendroideae):** Wu *et al.* (2010), NC\_014056

***Phalaenopsis aphrodite Rchb.f. subsp. formosana Christenson*, (Asparagales, Orchidaceae, Epidendroideae):** Chang *et al.* (2006), NC\_007499

***Asparagus officinalis L.*, (Asparagales, Asparagaceae, Asparagoideae),** Givnish *et al.* (2010), Leebens-Mack 1001-2010 (GA), HQ180403 (atpA), HQ180446 (atpB), HQ180489 (atpE), HQ180532 (atpF), HQ180575 (atpH), HQ180618 (atpI), HQ180738 (ccsA), HQ180661 (cemA), HQ180701 (clpP), HQ180777 (infA), HQ180855 (matK), HQ180894 (ndhA), HQ180935 (ndhB), HQ180979 (ndhC), HQ181022 (ndhD), HQ181063 (ndhE), HQ181104 (ndhF), HQ181143 (ndhG), HQ181186 (ndhH), HQ181228 (ndhI), HQ181272 (ndhJ), HQ181352 (petA), HQ181395 (petB), HQ181439 (petD), HQ181483 (petG), HQ181524 (petL), HQ181567 (petN), HQ181608 (psaA), HQ181651 (psaB), HQ181694 (psaC), HQ181738 (psaI), HQ181778 (psaJ), HQ181820 (psbA), HQ181863 (psbB), HQ181905 (psbC), HQ181948 (psbD), HQ181991 (psbE), HQ182035 (psbF), HQ182077 (psbH), HQ182120 (psbI), HQ182161 (psbJ), HQ182204 (psbK), HQ182246 (psbL), HQ182289 (psbM), HQ182330 (psbN), HQ182374 (psbT), HQ180813 (psbZ), HQ182417 (rbcL), HQ182502 (rpl14), HQ182544 (rpl16), HQ182459 (rpl2), HQ182586 (rpl20), HQ182627 (rpl22), HQ182666 (rpl23), HQ182740 (rpl33), HQ182782 (rpl36), HQ182823 (rpoA), HQ182862 (rpoB), HQ182904 (rpoC1), HQ182945 (rpoC2), HQ183193 (rps11), HQ183232 (rps12), HQ183266 (rps14), HQ183309 (rps15), HQ183345 (rps16), HQ183381 (rps18), HQ183420 (rps19), HQ182987 (rps2), HQ183029 (rps3), HQ183065 (rps4), HQ183106 (rps7), HQ183150 (rps8), HQ183492 (rrn16), HQ183558 (rrn23), HQ183533 (rrn4.5), HQ183459 (rrn5), HQ183599 (ycf2), HQ183629 (ycf3), HQ183672 (ycf4)

***Nolina atopocarpa Bartlett*, (Asparagales, Asparagaceae, Nolinoideae),** Givnish *et al.* (2010), McKain 114 (GA), HQ180429 (atpA), HQ180471 (atpB), HQ180514 (atpE), HQ180558 (atpF), HQ180601 (atpH), HQ180644 (atpI), HQ180763 (ccsA), HQ180686 (cemA), HQ180723 (clpP), HQ180797 (infA), HQ180878 (matK), HQ180919 (ndhA), HQ180961 (ndhB), HQ181005 (ndhC), HQ181047 (ndhD), HQ181088 (ndhE), HQ181126 (ndhF), HQ181168 (ndhG), HQ181212 (ndhH), HQ181254 (ndhI), HQ181298 (ndhJ), HQ181337 (ndhK), HQ181377 (petA), HQ181421 (petB), HQ181465 (petD), HQ181508 (petG), HQ181549 (petL), HQ181591 (petN), HQ181634 (psaA), HQ181677 (psaB), HQ181720 (psaC), HQ181762 (psaI), HQ181802 (psaJ), HQ181845 (psbA), HQ181888 (psbB), HQ181931 (psbC), HQ181974 (psbD), HQ182017 (psbE), HQ182060 (psbF), HQ182102 (psbH), HQ182145 (psbI), HQ182187 (psbJ), HQ182229 (psbK), HQ182271 (psbL), HQ182313 (psbM), HQ182356 (psbN), HQ182399 (psbT), HQ180838 (psbZ), HQ182442 (rbcL), HQ182526 (rpl14), HQ182484 (rpl2), HQ182610 (rpl20), HQ182692 (rpl23), HQ182724 (rpl32), HQ182765 (rpl33), HQ182807 (rpl36), HQ182846 (rpoA), HQ182887 (rpoB), HQ182929 (rpoC1), HQ182971 (rpoC2), HQ183216 (rps11), HQ183252 (rps12), HQ183292 (rps14), HQ183330 (rps15), HQ183365 (rps16), HQ183404 (rps18), HQ183445 (rps19), HQ183012 (rps2), HQ183090 (rps4), HQ183132 (rps7), HQ183175 (rps8), HQ183517 (rrn16), HQ183583 (rrn23), HQ183476 (rrn5), HQ183616 (ycf2), HQ183655 (ycf3), HQ183697 (ycf4)

***Albuca kirkii (Baker) Brenan*, (Asparagales, Asparagaceae, Ornithogaleae),** Givnish *et al.* (2010), McKain 111 (GA), HQ180401 (atpA), HQ180444 (atpB), HQ180487 (atpE), HQ180530 (atpF), HQ180573 (atpH), HQ180616 (atpI), HQ180736 (ccsA), HQ180659 (cemA), HQ180699 (clpP), HQ180853 (matK), HQ180892 (ndhA), HQ180933 (ndhB), HQ180977 (ndhC), HQ181020 (ndhD), HQ181061 (ndhE), HQ181141 (ndhG), HQ181184 (ndhH), HQ181226 (ndhI), HQ181270 (ndhJ), HQ181313 (ndhK), HQ181350 (petA), HQ181393 (petB), HQ181437 (petD), HQ181481 (petG), HQ181522 (petL), HQ181565 (petN), HQ181606 (psaA), HQ181649 (psaB), HQ181692 (psaC), HQ181736 (psaI), HQ181776 (psaJ), HQ181818 (psbA), HQ181861 (psbB), HQ181903 (psbC), HQ181946 (psbD), HQ181989 (psbE), HQ182033 (psbF), HQ182075 (psbH), HQ182118 (psbI), HQ182159 (psbJ), HQ182202 (psbK), HQ182244 (psbL), HQ182287 (psbM), HQ182328 (psbN), HQ182372 (psbT), HQ180811 (psbZ), HQ182415 (rbcL), HQ182500 (rpl14), HQ182542 (rpl16), HQ182457 (rpl2), HQ182584 (rpl20), HQ182625 (rpl22), HQ182664 (rpl23), HQ182738 (rpl33), HQ182780 (rpl36), HQ182821 (rpoA), HQ182860 (rpoB), HQ182902 (rpoC1), HQ182943 (rpoC2), HQ183191 (rps11), HQ183230 (rps12), HQ183264 (rps14), HQ183307 (rps15), HQ183343 (rps16), HQ183379 (rps18), HQ183418 (rps19), HQ182985 (rps2), HQ183027 (rps3), HQ183063 (rps4), HQ183104 (rps7), HQ183148 (rps8), HQ183490 (rrn16), HQ183556 (rrn23), HQ183531 (rrn4.5), HQ183597 (ycf2), HQ183627 (ycf3), HQ183670 (ycf4)

***Chlorophytum rhizopendulum Bjarå & Hemp*, (Asparagales, Asparagaceae, Agavoideae),** Givnish *et al.* (2010), McKain 110 (GA), HQ180408 (atpA), HQ180451 (atpB), HQ180494 (atpE), HQ180537 (atpF), HQ180580 (atpH), HQ180623 (atpI), HQ180743 (ccsA), HQ180666 (cemA), HQ180705 (clpP), HQ180859 (matK), HQ180899 (ndhA), HQ180940 (ndhB), HQ180984 (ndhC), HQ181027 (ndhD), HQ181068 (ndhE),

HQ181108 (ndhF), HQ181148 (ndhG), HQ181191 (ndhH), HQ181233 (ndhI), HQ181277 (ndhJ), HQ181319 (ndhK), HQ181357 (petA), HQ181400 (petB), HQ181444 (petD), HQ181488 (petG), HQ181529 (petL), HQ181572 (petN), HQ181613 (psaA), HQ181656 (psaB), HQ181699 (psaC), HQ181743 (psaI), HQ181783 (psaJ), HQ181825 (psbA), HQ181868 (psbB), HQ181910 (psbC), HQ181953 (psbD), HQ181996 (psbE), HQ182040 (psbF), HQ182082 (psbH), HQ182125 (psbI), HQ182166 (psbJ), HQ182209 (psbK), HQ182251 (psbL), HQ182294 (psbM), HQ182335 (psbN), HQ182379 (psbT), HQ180818 (psbZ), HQ182422 (rbcL), HQ182464 (rpl2), HQ182591 (rpl20), HQ182671 (rpl23), HQ182711 (rpl32), HQ182745 (rpl33), HQ182787 (rpl36), HQ182828 (rpoA), HQ182867 (rpoB), HQ182909 (rpoC1), HQ182950 (rpoC2), HQ183197 (rps11), HQ183271 (rps14), HQ183313 (rps15), HQ183349 (rps16), HQ183386 (rps18), HQ182992 (rps2), HQ183070 (rps4), HQ183111 (rps7), HQ183497 (rrn16), HQ183563 (rrn23), HQ183463 (rrn5), HQ183602 (ycf2), HQ183634 (ycf3), HQ183677 (ycf4)

***Hosta ventricosa* (Salisb.) Stearn**, (Asparagales, Asparagaceae, Agavoideae), Givnish *et al.* (2010), McKain 106 (GA), HQ180418 (atpA), HQ180461 (atpB), HQ180504 (atpE), HQ180547 (atpF), HQ180590 (atpH), HQ180633 (atpI), HQ180753 (ccsA), HQ180676 (cemA), HQ180714 (clpP), HQ180788 (infA), HQ180868 (matK), HQ180909 (ndhA), HQ180950 (ndhB), HQ180994 (ndhC), HQ181037 (ndhD), HQ181078 (ndhE), HQ181158 (ndhG), HQ181201 (ndhH), HQ181243 (ndhI), HQ181287 (ndhJ), HQ181328 (ndhK), HQ181367 (petA), HQ181410 (petB), HQ181454 (petD), HQ181497 (petG), HQ181538 (petL), HQ181581 (petN), HQ181623 (psaA), HQ181666 (psaB), HQ181709 (psaC), HQ181752 (psaI), HQ181792 (psaJ), HQ181834 (psbA), HQ181877 (psbB), HQ181920 (psbC), HQ181963 (psbD), HQ182006 (psbE), HQ182050 (psbF), HQ182092 (psbH), HQ182135 (psbI), HQ182176 (psbJ), HQ182219 (psbK), HQ182261 (psbL), HQ182303 (psbM), HQ182345 (psbN), HQ182389 (psbT), HQ180828 (psbZ), HQ182431 (rbcL), HQ182515 (rpl14), HQ182558 (rpl16), HQ182473 (rpl2), HQ182600 (rpl20), HQ182639 (rpl22), HQ182681 (rpl23), HQ182717 (rpl32), HQ182754 (rpl33), HQ182796 (rpl36), HQ182837 (rpoA), HQ182877 (rpoB), HQ182919 (rpoC1), HQ182960 (rpoC2), HQ183207 (rps11), HQ183242 (rps12), HQ183281 (rps14), HQ183321 (rps15), HQ183356 (rps16), HQ183395 (rps18), HQ183434 (rps19), HQ183001 (rps2), HQ183041 (rps3), HQ183079 (rps4), HQ183121 (rps7), HQ183164 (rps8), HQ183507 (rrn16), HQ183573 (rrn23), HQ183469 (rrn5), HQ183608 (ycf2), HQ183644 (ycf3), HQ183687 (ycf4)

***Yucca schidigera* Ortgies**, (Asparagales, Asparagaceae, Agavoideae), Leebens-Mack *et al.* (2005), DQ069337–DQ069702, EU016681–EU016700

***Hesperaloe parviflora* (Torr.) J.M.Coult.** (Asparagales, Asparagaceae, Agavoideae), Givnish *et al.* (2010), McKain 102 (GA), HQ180417 (atpA), HQ180460 (atpB), HQ180503 (atpE), HQ180546 (atpF), HQ180589 (atpH), HQ180632 (atpI), HQ180752 (ccsA), HQ180675 (cemA), HQ180713 (clpP), HQ180787 (infA), HQ180908 (ndhA), HQ180949 (ndhB), HQ180993 (ndhC), HQ181036 (ndhD), HQ181077 (ndhE), HQ181157 (ndhG), HQ181200 (ndhH), HQ181242 (ndhI), HQ181286 (ndhJ), HQ181327 (ndhK), HQ181366 (petA), HQ181409 (petB), HQ181453 (petD), HQ181496 (petG), HQ181537 (petL), HQ181580 (petN), HQ181622 (psaA), HQ181665 (psaB), HQ181708 (psaC), HQ181751 (psaI), HQ181791 (psaJ), HQ181876 (psbB), HQ181919 (psbC), HQ181962 (psbD), HQ182005 (psbE), HQ182049 (psbF), HQ182091 (psbH), HQ182134 (psbI), HQ182175 (psbJ), HQ182218 (psbK), HQ182260 (psbL), HQ182302 (psbM), HQ182344 (psbN), HQ182388 (psbT), HQ180827 (psbZ), HQ182430 (rbcL), HQ182514 (rpl14), HQ182557 (rpl16), HQ182472 (rpl2), HQ182599 (rpl20), HQ182638 (rpl22), HQ182680 (rpl23), HQ182716 (rpl32), HQ182753 (rpl33), HQ182795 (rpl36), HQ182836 (rpoA), HQ182876 (rpoB), HQ182918 (rpoC1), HQ182959 (rpoC2), HQ183206 (rps11), HQ183241 (rps12), HQ183280 (rps14), HQ183320 (rps15), HQ183394 (rps18), HQ183433 (rps19), HQ183000 (rps2), HQ183040 (rps3), HQ183078 (rps4), HQ183120 (rps7), HQ183163 (rps8), HQ183506 (rrn16), HQ183572 (rrn23), HQ183468 (rrn5), HQ183607 (ycf2), HQ183643 (ycf3), HQ183686 (ycf4)

***Kingia australis* R. Br.**, (incertae sedis, Dasypogonaceae), Givnish *et al.* (2010), K.R. Thiele 3703 (PERTH), JX051651

***Calcectasia narragara* R.L.Barrett & K.W.Dixon**, (incertae sedis, Dasypogonaceae), Barrett *et al.* (2013), J.G. Conran *et al.* 928 (PERTH, ADU), JX088666

***Calamus caryotoides* A.Cunn. ex Mart.**, (Arecales, Arecaceae, Calamoideae), MBC 97-239A; Givnish *et al.* (2010), M. Perry s.n., 14 July 1997 (FTG), JX088663

***Bismarckia nobilis* Hildebrandt & H.Wendl.**, (Arecales, Arecaceae, Coryphoideae), Barrett *et al.* (2013), MBC 95-1138K; L. Noblick 5054 (FTG), JX088664

***Phoenix dactylifera* L.**, (Arecales, Arecaceae, Coryphoideae), Yang *et al.* (2010), NC\_013991.

*Pseudophoenix vinifera* (Mart.) Becc. (Arecales, Arecaceae, Ceroxyloideae), Barrett *et al.* (2013), MBC 97231C; W.B. Zomlefer *et al.* 2355 (FTG), JX088662

*Elaeis oleifera* (Kunth) Cortés, (Arecales, Arecaceae, Arecoideae), Leebens-Mack *et al.* (2005), EU016883–EU016962

*Chamaedorea seifrizii* Burret, (Arecales, Arecaceae, Arecoideae), Barrett *et al.* (2013), Zomlefer 2358 (GA), JX088667.

*Xiphidium caeruleum* Aubl., (Commelinales, Haemodoraceae, Haemodoroideae), Barrett *et al.* (2013), FTBG 951124A; W.B. Zomlefer *et al.* 2328 (FTG, NY), JX088669

*Heliconia collinsiana* Griggs (Zingiberales, Heliconiaceae), Barrett *et al.* (2013), FTBG 58523A; W.B. Zomlefer *et al.* 2344 (FTG, NY), JX088660

*Musa acuminata* Colla, (Zingiberales, Musaceae), Leebens-Mack *et al.* (2005), EU016983–EU017063

*Alpinia zerumbet* (Pers.) B.L.Burtt & R.M.Sm., (Zingiberales, Zingiberaceae, Alpinioideae), Barrett *et al.* (2013), FTBG X.17-31A; W.B. Zomlefer *et al.* 2295 (FTG, GA, NY), JX088668

*Zingiber spectabile* Griff., (Zingiberales, Zingiberaceae, Zingiberoideae), Barrett *et al.* (2013), FTBG 95-825A; W.B. Zomlefer *et al.* 2298 (FTG, GA, NY), JX088661

*Reenealmia alpinia* Rottb. Maas (Zingiberales, Zingiberaceae, Alpinioideae), Givnish *et al.* (2010), Zomlefer *et al.* 2322. (GA), HQ180435 (atpA), HQ180478 (atpB), HQ180521 (atpE), HQ180564 (atpF), HQ180607 (atpH), HQ180650 (atpI), HQ180769 (ccsA), HQ180693 (cemA), HQ180730 (clpP), HQ180803 (infA), HQ180885 (matK), HQ180926 (ndhA), HQ180968 (ndhB), HQ181011 (ndhC), HQ181054 (ndhD), HQ181095 (ndhE), HQ181133 (ndhF), HQ181175 (ndhG), HQ181219 (ndhH), HQ181261 (ndhI), HQ181304 (ndhJ), HQ181343 (ndhK), HQ181384 (petA), HQ181428 (petB), HQ181472 (petD), HQ181515 (petG), HQ181556 (petL), HQ181597 (petN), HQ181640 (psaA), HQ181683 (psaB), HQ181727 (psaC), HQ181769 (psaI), HQ181809 (psaJ), HQ181852 (psbA), HQ181895 (psbB), HQ182024 (psbE), HQ182067 (psbF), HQ182109 (psbH), HQ182151 (psbI), HQ182193 (psbJ), HQ182236 (psbK), HQ182278 (psbL), HQ182320 (psbM), HQ182363 (psbN), HQ182406 (psbT), HQ180845 (psbZ), HQ182449 (rbcL), HQ182533 (rpl14), HQ182575 (rpl16), HQ182491 (rpl2), HQ182617 (rpl20), HQ182655 (rpl22), HQ182699 (rpl23), HQ182730 (rpl32), HQ182772 (rpl33), HQ182814 (rpl36), HQ182853 (rpoA), HQ182894 (rpoB), HQ182936 (rpoC1), HQ182978 (rpoC2), HQ183223 (rps11), HQ183258 (rps12), HQ183298 (rps14), HQ183371 (rps16), HQ183411 (rps18), HQ183451 (rps19), HQ183018 (rps2), HQ183056 (rps3), HQ183096 (rps4), HQ183139 (rps7), HQ183182 (rps8), HQ183523 (rrn16), HQ183590 (rrn23), HQ183548 (rrn4.5), HQ183482 (rrn5), HQ183622 (ycf2), HQ183662 (ycf3), HQ183704 (ycf4)

*Brocchinia micrantha* (Baker) Mez, (Poales, Bromeliaceae, Brocchinioideae), Givnish *et al.* (2010), Givnish UW-8-2009-2 (WIS), HQ180405 (atpA), HQ180448 (atpB), HQ180491 (atpE), HQ180534 (atpF), HQ180577 (atpH), HQ180620 (atpI), HQ180740 (ccsA), HQ180663 (cemA), HQ180703 (clpP), HQ180857 (matK), HQ180896 (ndhA), HQ180937 (ndhB), HQ180981 (ndhC), HQ181024 (ndhD), HQ181065 (ndhE), HQ181106 (ndhF), HQ181145 (ndhG), HQ181188 (ndhH), HQ181230 (ndhI), HQ181274 (ndhJ), HQ181316 (ndhK), HQ181354 (petA), HQ181397 (petB), HQ181441 (petD), HQ181485 (petG), HQ181526 (petL), HQ181569 (petN), HQ181610 (psaA), HQ181653 (psaB), HQ181696 (psaC), HQ181740 (psaI), HQ181780 (psaJ), HQ181822 (psbA), HQ181865 (psbB), HQ181907 (psbC), HQ181950 (psbD), HQ181993 (psbE), HQ182037 (psbF), HQ182079 (psbH), HQ182122 (psbI), HQ182163 (psbJ), HQ182206 (psbK), HQ182248 (psbL), HQ182291 (psbM), HQ182332 (psbN), HQ182376 (psbT), HQ180815 (psbZ), HQ182419 (rbcL), HQ182504 (rpl14), HQ182546 (rpl16), HQ182461 (rpl2), HQ182588 (rpl20), HQ182629 (rpl22), HQ182668 (rpl23), HQ182709 (rpl32), HQ182742 (rpl33), HQ182784 (rpl36), HQ182825 (rpoA), HQ182864 (rpoB), HQ182906 (rpoC1), HQ182947 (rpoC2), HQ183195 (rps11), HQ183268 (rps14), HQ183310 (rps15), HQ183347 (rps16), HQ183383 (rps18), HQ183422 (rps19), HQ182989 (rps2), HQ183031 (rps3), HQ183067 (rps4), HQ183108 (rps7), HQ183152 (rps8), HQ183494 (rrn16), HQ183560 (rrn23), HQ183461 (rrn5), HQ183631 (ycf3), HQ183674 (ycf4)

*Puya laxa* L.B.Sm., (Poales, Bromeliaceae, Puyoideae), Givnish *et al.* (2010), Leebens-Mack 1004-2010 (GA), HQ180433 (atpA), HQ180476 (atpB), HQ180519 (atpE), HQ180562 (atpF), HQ180605 (atpH), HQ180648 (atpI), HQ180767 (ccsA), HQ180691 (cemA), HQ180728 (clpP), HQ180883 (matK), HQ180924 (ndhA), HQ180966 (ndhB), HQ181009 (ndhC), HQ181052 (ndhD), HQ181093 (ndhE), HQ181131 (ndhF), HQ181173

(ndhG), HQ181217 (ndhH), HQ181259 (ndhI), HQ181302 (ndhJ), HQ181341 (ndhK), HQ181382 (petA), HQ181426 (petB), HQ181470 (petD), HQ181513 (petG), HQ181554 (petL), HQ181596 (petN), HQ181638 (psaA), HQ181681 (psaB), HQ181725 (psaC), HQ181767 (psaI), HQ181807 (psaJ), HQ181850 (psbA), HQ181893 (psbB), HQ181936 (psbC), HQ181979 (psbD), HQ182022 (psbE), HQ182065 (psbF), HQ182107 (psbH), HQ182149 (psbI), HQ182191 (psbJ), HQ182234 (psbK), HQ182276 (psbL), HQ182318 (psbM), HQ182361 (psbN), HQ182404 (psbT), HQ180843 (psbZ), HQ182447 (rbcL), HQ182531 (rpl14), HQ182573 (rpl16), HQ182489 (rpl2), HQ182615 (rpl20), HQ182653 (rpl22), HQ182697 (rpl23), HQ182728 (rpl32), HQ182770 (rpl33), HQ182812 (rpl36), HQ182851 (rpoA), HQ182892 (rpoB), HQ182934 (rpoC1), HQ182976 (rpoC2), HQ183221 (rps11), HQ183296 (rps14), HQ183335 (rps15), HQ183369 (rps16), HQ183409 (rps18), HQ183449 (rps19), HQ183016 (rps2), HQ183054 (rps3), HQ183094 (rps4), HQ183137 (rps7), HQ183180 (rps8), HQ183521 (rrn16), HQ183588 (rrn23), HQ183480 (rrn5), HQ183660 (ycf3), HQ183702 (ycf4)

***Neoregelia carolinae* (Beer) L.B.Sm.**, (Poales, Bromeliaceae, Bromelioideae), Givnish *et al.* (2010), McKain 112 (GA), HQ180428 (atpA), HQ180470 (atpB), HQ180513 (atpE), HQ180557 (atpF), HQ180600 (atpH), HQ180643 (atpI), HQ180762 (ccsA), HQ180685 (cemA), HQ180722 (clpP), HQ180796 (infA), HQ180877 (matK), HQ180918 (ndhA), HQ180960 (ndhB), HQ181004 (ndhC), HQ181046 (ndhD), HQ181087 (ndhE), HQ181125 (ndhF), HQ181167 (ndhG), HQ181211 (ndhH), HQ181253 (ndhI), HQ181297 (ndhJ), HQ181336 (ndhK), HQ181376 (petA), HQ181420 (petB), HQ181464 (petD), HQ181507 (petG), HQ181548 (petL), HQ181590 (petN), HQ181633 (psaA), HQ181676 (psaB), HQ181719 (psaC), HQ181761 (psaI), HQ181801 (psaJ), HQ181844 (psbA), HQ181887 (psbB), HQ181930 (psbC), HQ181973 (psbD), HQ182016 (psbE), HQ182059 (psbF), HQ182101 (psbH), HQ182144 (psbI), HQ182186 (psbJ), HQ182228 (psbK), HQ182270 (psbL), HQ182312 (psbM), HQ182355 (psbN), HQ182398 (psbT), HQ180837 (psbZ), HQ182441 (rbcL), HQ182525 (rpl14), HQ182568 (rpl16), HQ182483 (rpl2), HQ182609 (rpl20), HQ182648 (rpl22), HQ182691 (rpl23), HQ182723 (rpl32), HQ182764 (rpl33), HQ182806 (rpl36), HQ182845 (rpoA), HQ182886 (rpoB), HQ182928 (rpoC1), HQ182970 (rpoC2), HQ183215 (rps11), HQ183291 (rps14), HQ183329 (rps15), HQ183364 (rps16), HQ183403 (rps18), HQ183444 (rps19), HQ183011 (rps2), HQ183049 (rps3), HQ183089 (rps4), HQ183131 (rps7), HQ183174 (rps8), HQ183516 (rrn16), HQ183582 (rrn23), HQ183475 (rrn5), HQ183615 (ycf2), HQ183654 (ycf3), HQ183696 (ycf4)

***Typha latifolia* L.**, (Poales, Typhaceae), Guisinger *et al.* (2010), NC\_013823

***Cyperus alternifolius* L.**, (Poales, Cyperaceae, Cyperoideae), Givnish *et al.* (2010), Leebens-Mack 1002-2010 (GA), HQ180410 (atpA), HQ180453 (atpB), HQ180496 (atpE), HQ180539 (atpF), HQ180582 (atpH), HQ180625 (atpI), HQ180745 (ccsA), HQ180668 (cemA), HQ180861 (matK), HQ180901 (ndhA), HQ180942 (ndhB), HQ180986 (ndhC), HQ181029 (ndhD), HQ181070 (ndhE), HQ181110 (ndhF), HQ181150 (ndhG), HQ181193 (ndhH), HQ181235 (ndhI), HQ181279 (ndhJ), HQ181321 (ndhK), HQ181359 (petA), HQ181402 (petB), HQ181446 (petD), HQ181489 (petG), HQ181530 (petL), HQ181615 (psaA), HQ181658 (psaB), HQ181701 (psaC), HQ181784 (psaJ), HQ181827 (psbA), HQ181912 (psbC), HQ181955 (psbD), HQ181998 (psbE), HQ182042 (psbF), HQ182084 (psbH), HQ182127 (psbI), HQ182168 (psbJ), HQ182211 (psbK), HQ182253 (psbL), HQ182337 (psbN), HQ182381 (psbT), HQ180820 (psbZ), HQ182424 (rbcL), HQ182508 (rpl14), HQ182550 (rpl16), HQ182466 (rpl2), HQ182593 (rpl20), HQ182632 (rpl22), HQ182673 (rpl23), HQ182747 (rpl33), HQ182869 (rpoB), HQ182911 (rpoC1), HQ182952 (rpoC2), HQ183199 (rps11), HQ183236 (rps12), HQ183273 (rps14), HQ183315 (rps15), HQ183351 (rps16), HQ183426 (rps19), HQ183113 (rps7), HQ183156 (rps8), HQ183499 (rrn16), HQ183565 (rrn23), HQ183464 (rrn5), HQ183636 (ycf3), HQ183679 (ycf4)

***Flagellaria indica* L.**, (Poales, Flagellariaceae), Givnish *et al.* (2010), K. Hansen 77-394 (BH): HQ180414 (atpA), HQ180457 (atpB), HQ180500 (atpE), HQ180543 (atpF), HQ180586 (atpH), HQ180629 (atpI), HQ180749 (ccsA), HQ180672 (cemA), HQ180710 (clpP), HQ180784 (infA), HQ180865 (matK), HQ180905 (ndhA), HQ180946 (ndhB), HQ180990 (ndhC), HQ181033 (ndhD), HQ181074 (ndhE), HQ181113 (ndhF), HQ181154 (ndhG), HQ181197 (ndhH), HQ181239 (ndhI), HQ181283 (ndhJ), HQ181324 (ndhK), HQ181363 (petA), HQ181406 (petB), HQ181450 (petD), HQ181493 (petG), HQ181534 (petL), HQ181577 (petN), HQ181619 (psaA), HQ181662 (psaB), HQ181705 (psaC), HQ181748 (psaI), HQ181788 (psaJ), HQ181831 (psbA), HQ181873 (psbB), HQ181916 (psbC), HQ181959 (psbD), HQ182002 (psbE), HQ182046 (psbF), HQ182088 (psbH), HQ182131 (psbI), HQ182172 (psbJ), HQ182215 (psbK), HQ182257 (psbL), HQ182299 (psbM), HQ182341 (psbN), HQ182385 (psbT), HQ180824 (psbZ), HQ182512 (rpl14), HQ182554 (rpl16), HQ182470 (rpl2), HQ182597 (rpl20), HQ182635 (rpl22), HQ182677 (rpl23), HQ182714 (rpl32), HQ182750 (rpl33), HQ182792 (rpl36), HQ182833 (rpoA), HQ182873 (rpoB), HQ182915 (rpoC1), HQ182956 (rpoC2), HQ183203 (rps11), HQ183239 (rps12), HQ183277 (rps14), HQ183318 (rps15), HQ183354 (rps16), HQ183391 (rps18), HQ183430 (rps19), HQ182997 (rps2), HQ183037 (rps3), HQ183075 (rps4), HQ183117 (rps7),

HQ183160 (rps8), HQ183503 (rrn16), HQ183569 (rrn23), HQ183466 (rrn5), HQ183605 (ycf2), HQ183640 (ycf3), HQ183683 (ycf4)

*Zea mays* L., (Poales, Poaceae, Panicoideae), Maier *et al.*, (1995), NC\_001666

*Saccharum officinarum* L., (Poales, Poaceae, Panicoideae), Asano *et al.*, (2004), NC\_006084

*Sorghum bicolor* (L.) Moench, (Poales, Poaceae, Panicoideae), Sasaki *et al.*, (2007), NC\_008602

*Oryza sativa* L., (Poales, Poaceae, Ehrhartoideae), Hiratsuka *et al.*, (1989), NC\_001320

*Hordeum vulgare* L., (Poales, Poaceae, Poöideae), Sasaki *et al.*, (2007), NC\_008590

*Triticum aestivum* L., (Poales, Poaceae, Poöideae), Ogihara *et al.*, (2002), NC\_002762
